# Supplementary material for: Glycemic and lipid variability for predicting complications and mortality in diabetes mellitus using machine learning
Source: Springer Nature journal article supplement (doi:10.1186/s12902-021-00751-4), 2021-05-04
Supplement: MOESM1 [file 19131738]

**Title Page: Prediction of Complications and All-cause Mortality with Glycemic and Lipid  
Variability in Diabetes Mellitus Using Machine Learning**

Sharen Lee \* <sup>1</sup>, Jiandong Zhou \* <sup>2</sup>, Wing Tak Wong PhD <sup>3</sup>, Tong Liu MD PhD <sup>4</sup>, William KK Wu  
PhD FRCPath FRCP <sup>5</sup>, Ian Chi Kei Wong PhD <sup>6,7</sup>, Qingpeng Zhang PhD # <sup>2</sup>, Gary Tse PhD FRCP  
FFPH # <sup>3,7</sup>

<sup>1</sup> Cardiovascular Analytics Group, Laboratory of Cardiovascular Physiology, Li Ka Shing Institute of  
Health Sciences, Hong Kong, China

<sup>2</sup> School of Data Science, City University of Hong Kong, Hong Kong, China

<sup>3</sup> School of Life Sciences, Chinese University of Hong Kong, Hong Kong S.A.R., China

<sup>4</sup> Tianjin Key Laboratory of Ionic-Molecular Function of Cardiovascular disease, Department of  
Cardiology, Tianjin Institute of Cardiology, Second Hospital of Tianjin Medical University, Tianjin  
300211, China

<sup>5</sup> Li Ka Shing Institute of Health Sciences, Faculty of Medicine, The Chinese University of Hong  
Kong, Hong Kong, China

<sup>6</sup> Department of Pharmacology and Pharmacy, University of Hong Kong, Pokfulam, Hong Kong,  
China

Medicines Optimisation Research and Education (CMORE), UCL School of Pharmacy, London,  
United Kingdom

<sup>7</sup> Faculty of Health and Medical Sciences, University of Surrey, GU2 7AL, Guildford, United  
Kingdom

Co-first authors

# **Correspondence to:**

*Dr. Qingpeng Zhang, PhD*

School of Data Science, City University of Hong Kong,

Hong Kong SAR, China

Email: [qingpeng.zhang@cityu.edu.hk](mailto:qingpeng.zhang@cityu.edu.hk)

*Dr. Gary Tse, PhD, FRCP, FFPH*

*Tianjin Key Laboratory of Ionic-Molecular Function of Cardiovascular disease, Department of  
Cardiology, Tianjin Institute of Cardiology, Second Hospital of Tianjin Medical University, Tianjin  
300211, China*

*Faculty of Health and Medical Sciences, University of Surrey, GU2 7AL, Guildford, United Kingdom*

Email: [g.tse@surrey.ac.uk](mailto:g.tse@surrey.ac.uk)

## Supplementary Details

### *Description of anti-diabetic drugs*

The mean daily insulin dosage regimen of the cohort is  $20.2 \pm 12.6$  units per day. Other classes of anti-diabetic agents prescribed include: 1) biguanide (n= 14 522, mean daily dose=  $1682 \pm 882$  mg/day), 2) sulphonylurea (n= 10 459, mean daily dose=  $191 \pm 312$ mg/day), 3) thiazolidinedione (n= 890, mean daily dose=  $7.59 \pm 9.03$ mg/day), 4) alpha-glucosidase inhibitor (n= 751, mean daily dose=  $138 \pm 128$ mg/day), 5) DPP4 inhibitor (n= 113, mean daily dose=  $91.6 \pm 27.5$ mg), 6) GLP agonist (n= 13, mean daily dose=  $11.9 \pm 3.96$ mg/day), 7) meglitinide (n= 9, mean daily dose=  $1.17 \pm 0.887$ mg/day). The following classes of cardiovascular medications were prescribed: 1) ACEI/ ARB (n= 15 059, mean daily dose=  $17.4 \pm 37.0$ mg/day), 2) CCB (n= 10 986, mean daily dose=  $60.0 \pm 50.6$ mg/day), 3) lipid-lowering agents (n= 10 685, mean daily dose=  $23.3 \pm 68.4$  mg/day), 4) aspirin (n= 9114, mean daily dose=  $102 \pm 54.1$  mg/day), 5) diuretic (n= 7 349, mean daily dose=  $40.3 \pm 64.2$ mg/day), 6) beta-adrenergic receptor blocker (n= 7 082, mean daily dose=  $79.4 \pm 81.6$ mg/day).

### *Description of machine learning results*

There may be slight difference between importance ranking and minimal depth sequence, although they both can be used to identify the highly predictive risk variables. Both importance ranking and minimal depth were used to uncover the most important variables for predicting time-to-event complication outcomes.

The results showed that age, CKD, baseline hemoglobin, biguanide, and AMI are the five most predictive risk variables to predict all-cause mortality. Moreover, age is the most important variable for renal complication prediction, followed by baseline hemoglobin, HF, AMI, and IHD. AMI, CKD, age, stroke and mean HbA1c are much predictive for PVD prediction. Age, biguanide, IHD, baseline hemoglobin shows great importance for neurological complication. IHD, biguanide, standard deviation of HbA1c, and mean triglyceride are the most five predictive risk factors to identify

ophthalmological complication. For predicting ischemic stroke, age, HF, HT, stroke, IHD are significantly predictive. Age, CKD, AMI, IHD, HF, and HT shows much informative for AF outcome prediction. While CKD, AMI, age, baseline hemoglobin and mean HDL were very useful to predict HF outcome. For ICH prediction, patient's age, baseline hemoglobin, CKD, HT, mean IDL are more predictive, while age, AMI, HF, baseline hemoglobin, and mean triglyceride are the most important for IHD outcome prediction. AMI, HF, age, CKD, and baseline hemoglobin are the most informative for AMI outcome prediction, while patient's age, gender, hypoglycemia, and mean HDL is useful for osteoporosis prediction.

**Supplementary Table 1. ICD-9 of Outcome and Pre-existing Comorbidities**

|                                               | ICD Code                                                                                    |
|-----------------------------------------------|---------------------------------------------------------------------------------------------|
| Type 1 Diabetes Mellitus                      | 250.01                                                                                      |
| <b>Outcome</b>                                |                                                                                             |
| Neurological Complications                    | 250.6                                                                                       |
| Ophthalmological Complications                | 250.5                                                                                       |
| Renal Complications                           | 250.4                                                                                       |
| Peripheral Vascular Disease                   | 250.7                                                                                       |
| Ischemic Stroke and Transient Ischemic Attack | 433.01, 433.11, 433.21, 433.31, 433.81, 433.91, 434.01, 434.91, 436, 435                    |
| Intracranial Hemorrhage                       | 430.00, 431.00, 432.00, 432.10, 432.90, 852.00-852.09, 852.20-852.29, 852.40-852.49, 853.00 |
| Atrial Fibrillation                           | 427.31, 429.4                                                                               |
| Heart Failure                                 | 428.00-428.99                                                                               |
| Ischemic Heart Disease                        | 410.00-411.99, 413.00-414.99                                                                |
| Acute Myocardial Infarction                   | 410.00-410.99                                                                               |
| Osteoporosis                                  | 733.00                                                                                      |
| Dementia                                      | 290.00-290.99, 331.00, 294.10-294.29, 331.19                                                |
| <b>Pre-existing Comorbidity</b>               |                                                                                             |
| Chronic Renal Disease                         | 585.00-585.99                                                                               |
| Chronic Obstructive Pulmonary Disease         | 490.00-496.99                                                                               |
| Heart Failure                                 | 398.91, 402.91, 428.00-428.99                                                               |
| Ischemic Heart Disease                        | 411.00-411.99, 413.00-414.99                                                                |
| Hypertension                                  | 401.9                                                                                       |
| Chronic Liver Disease                         | 570.00-573.99                                                                               |
| Acute Myocardial Infarction                   | 410.00-410.99, 412.00-412.99                                                                |
| Stroke                                        | 430.00-438.99                                                                               |

**Supplementary Table 2. Extracted parameters of patient data**

| Category                      | Parameters                                                                                                                                                                                                                                                                         |
|-------------------------------|------------------------------------------------------------------------------------------------------------------------------------------------------------------------------------------------------------------------------------------------------------------------------------|
| Demographic                   | Age<br>Male<br>Type 1 Diabetes Mellitus                                                                                                                                                                                                                                            |
| Comorbidities                 | Hypertension<br>Ophthalmological Complications<br>Ischemic Heart Disease<br>Ischemic Stroke and Transient Ischemic Attack<br>Heart Failure<br>Chronic Renal Disease<br>Chronic Liver Disease<br>Acute Myocardial Infarction<br>Chronic Obstructive Pulmonary Disease               |
| Anti-diabetic Medication      | Biguanide<br>Sulphonylurea<br>Thiazolidinedione<br>Alpha-Glucosidase<br>Dipeptidyl Peptidase-4 Inhibitor<br>Glucagon-Like Peptide-1 Receptor Agonist                                                                                                                               |
| Cardiovascular Medication     | Angiotensinogen-Converting Enzyme Inhibitor/ Angiotensin-Receptor Blocker<br>Calcium Channel Blocker<br>Lipid-Lowering Agents<br>Aspirin<br>Diuretic<br>Beta-Adrenergic Receptor Blocker                                                                                           |
| Urinalysis                    | Albumin/Creatinine Ratio (mg/mmol)<br>Creatinine Clearance (ml/min)<br>Spot Protein (g/d)<br>Spot Albumin (mg/L)<br>Spot Glucose (mmol/L)<br>24-hours Total Protein (g/d)<br>24-hours Total Albumin (mg/d)                                                                         |
| Glycemic and Lipid Profile    | Fasting Glucose (mmol/L)<br>Random Glucose (mmol/L)<br>HbA1c (%)<br>Total Cholesterol (mmol/L)<br>High Density Lipoprotein (HDL) Cholesterol (mmol/L)<br>Calculated Low Density Lipoprotein (LDL) Cholesterol (mmol/L)<br>Direct LDL Cholesterol (mmol/L)<br>Triglyceride (mmol/L) |
| Renal and Liver Function Test | Creatinine (umol/L)<br>Sodium (mmol/L)<br>Potassium (mmol/L)<br>Urate (umol/L)<br>Urea (mmol/L)<br>Albumin (g/L)<br>Alanine Aminotransferase (ALT) (U/L)<br>Alkaline Phosphatase (ALP) (U/L)<br>Total Bilirubin (umol/L)<br>Total Protein (g/L)                                    |
| Complete Blood Count          | Hemoglobin (g/dL)                                                                                                                                                                                                                                                                  |

Mean Corpuscular Hemoglobin (MCH) (pg)  
Mean Corpuscular Hemoglobin Concentration (MCHC) (g/dL)  
Mean Corpuscular Volume (MCV) (fL)  
Hematocrit (L/L)  
Basophil (x10<sup>9</sup>/L)  
Eosinophil (x10<sup>9</sup>/L)  
Lymphocyte (x10<sup>9</sup>/L)  
Monocyte (x10<sup>9</sup>/L)  
Neutrophil (x10<sup>9</sup>/L)  
Platelet (x10<sup>9</sup>/L)  
Red Blood Cell (x10<sup>12</sup>/L)  
White Blood Cell (x10<sup>9</sup>/L)

**Supplementary Table 3. Univariate Cox Regression for Adverse Outcomes**

| Predictor                             | Hazard Ratio (HR) | 95% Confidence Interval (CI) | P-Value           |
|---------------------------------------|-------------------|------------------------------|-------------------|
| <i>Neurological Complications</i>     |                   |                              |                   |
| Age                                   | 1.01              | [1.00, 1.01]                 | <b>&lt;0.001</b>  |
| Male                                  | 1.47              | [1.34, 1.62]                 | <b>&lt;0.0001</b> |
| Diabetes Duration                     | 1.04              | [1.03, 1.06]                 | <b>&lt;0.0001</b> |
| HbA1c                                 |                   |                              |                   |
| Baseline                              | 0.999             | [0.974, 1.02]                | 0.934             |
| Mean                                  | 1.18              | [1.14, 1.22]                 | <b>&lt;0.0001</b> |
| Standard Deviation                    | 1.13              | [1.07, 1.19]                 | <b>&lt;0.0001</b> |
| Coefficient of Variation              | 1.01              | [1.00, 1.01]                 | <b>0.014</b>      |
| Total Cholesterol                     |                   |                              |                   |
| Baseline                              | 0.960             | [0.917, 1.01]                | 0.081             |
| Mean                                  | 1.06              | [1.00, 1.12]                 | <b>0.042</b>      |
| Standard Deviation                    | 1.16              | [1.06, 1.27]                 | <b>0.001</b>      |
| Coefficient of Variation              | 1.01              | [1.00, 1.02]                 | <b>0.001</b>      |
| HDL Cholesterol                       |                   |                              |                   |
| Baseline                              | 1.01              | [0.891, 1.15]                | 0.863             |
| Mean                                  | 0.634             | [0.544, 0.741]               | <b>&lt;0.0001</b> |
| Standard Deviation                    | 0.555             | [0.323, 0.954]               | <b>0.033</b>      |
| Coefficient of Variation              | 1.00              | [0.994, 1.01]                | 0.881             |
| LDL Cholesterol                       |                   |                              |                   |
| Baseline                              | 1.00              | [0.946, 1.06]                | 0.964             |
| Mean                                  | 1.03              | [0.961, 1.11]                | 0.398             |
| Standard Deviation                    | 1.27              | [1.11, 1.45]                 | <b>&lt;0.001</b>  |
| Coefficient of Variation              | 1.01              | [1.00, 1.01]                 | <b>0.001</b>      |
| Triglyceride                          |                   |                              |                   |
| Baseline                              | 0.962             | [0.928, 0.997]               | <b>0.035</b>      |
| Mean                                  | 1.07              | [1.05, 1.10]                 | <b>&lt;0.0001</b> |
| Standard Deviation                    | 1.05              | [1.02, 1.09]                 | <b>0.002</b>      |
| Coefficient of Variation              | 1.00              | [0.999, 1.00]                | 0.229             |
| Baseline NLR                          | 0.994             | [0.981, 1.01]                | 0.357             |
| Baseline Hemoglobin Count             | 0.945             | [0.923, 0.968]               | <b>&lt;0.0001</b> |
| Baseline Anemia                       | 1.17              | [1.06, 1.29]                 | <b>0.002</b>      |
| Hypoglycemia Frequency                | 1.01              | [0.977, 1.04]                | 0.612             |
| Anti-Diabetic Agent                   |                   |                              |                   |
| Sulphonylurea                         | 0.936             | [0.853, 1.03]                | 0.162             |
| Biguanide                             | 0.978             | [0.892, 1.07]                | 0.629             |
| DPP4 Inhibitor                        | 0.923             | [0.392, 1.73]                | 0.608             |
| Thiazolidinedione                     | 0.718             | [0.539, 0.956]               | <b>0.023</b>      |
| Alpha-Glucosidase Inhibitor           | 1.05              | [0.812, 1.37]                | 0.694             |
| <i>Ophthalmological Complications</i> |                   |                              |                   |
| Age                                   | 0.999             | [0.997, 1.00]                | 0.427             |
| Male                                  | 1.01              | [0.955, 1.07]                | 0.694             |
| Diabetes Duration                     | 1.11              | [1.10, 1.12]                 | <b>&lt;0.0001</b> |
| HbA1c                                 |                   |                              |                   |
| Baseline                              | 1.01              | [0.997, 1.03]                | 0.109             |

|                             |       |                |                   |
|-----------------------------|-------|----------------|-------------------|
| Mean                        | 1.25  | [1.23, 1.28]   | <b>&lt;0.0001</b> |
| Standard Deviation          | 1.07  | [1.04, 1.11]   | <b>&lt;0.0001</b> |
| Coefficient of Variation    | 0.999 | [0.995, 1.00]  | 0.508             |
| Total Cholesterol           |       |                |                   |
| Baseline                    | 0.996 | [0.969, 1.03]  | 0.804             |
| Mean                        | 1.10  | [1.06, 1.14]   | <b>&lt;0.0001</b> |
| Standard Deviation          | 1.06  | [0.994, 1.13]  | 0.077             |
| Coefficient of Variation    | 1.00  | [0.997, 1.01]  | 0.760             |
| HDL Cholesterol             |       |                |                   |
| Baseline                    | 0.993 | [0.917, 1.08]  | 0.870             |
| Mean                        | 0.842 | [0.768, 0.923] | <b>&lt;0.001</b>  |
| Standard Deviation          | 0.432 | [0.305, 0.613] | <b>&lt;0.0001</b> |
| Coefficient of Variation    | 0.990 | [0.986, 0.995] | <b>&lt;0.0001</b> |
| LDL Cholesterol             |       |                |                   |
| Baseline                    | 0.994 | [0.959, 1.03]  | 0.720             |
| Mean                        | 1.05  | [1.00, 1.10]   | <b>0.032</b>      |
| Standard Deviation          | 1.06  | [0.974, 1.16]  | 0.170             |
| Coefficient of Variation    | 1.00  | [0.999, 1.00]  | 0.342             |
| Triglyceride                |       |                |                   |
| Baseline                    | 1.01  | [0.993, 1.03]  | 0.245             |
| Mean                        | 1.07  | [1.05, 1.08]   | <b>&lt;0.0001</b> |
| Standard Deviation          | 1.05  | [1.03, 1.07]   | <b>&lt;0.0001</b> |
| Coefficient of Variation    | 0.999 | [0.997, 1.00]  | 0.287             |
| Baseline NLR                | 0.986 | [0.977, 0.995] | <b>0.003</b>      |
| Baseline Hemoglobin Count   | 1.01  | [0.993, 1.03]  | 0.265             |
| Baseline Anemia             | 0.939 | [0.881, 1.00]  | 0.051             |
| Hypoglycemia Frequency      | 0.949 | [0.926, 0.972] | <b>&lt;0.0001</b> |
| Anti-Diabetic Agent         |       |                |                   |
| Sulphonylurea               | 0.972 | [0.918, 1.03]  | 0.344             |
| Biguanide                   | 1.41  | [1.33, 1.50]   | <b>&lt;0.0001</b> |
| DPP4 Inhibitor              | 1.01  | [0.660, 1.56]  | 0.954             |
| Thiazolidinedione           | 1.09  | [0.937, 1.26]  | 0.271             |
| Alpha-Glucosidase Inhibitor | 0.948 | [0.798, 1.13]  | 0.540             |

*Renal Complications*

|                          |       |               |                   |
|--------------------------|-------|---------------|-------------------|
| Age                      | 1.02  | [1.02, 1.02]  | <b>&lt;0.0001</b> |
| Male                     | 1.12  | [1.06, 1.18]  | <b>&lt;0.0001</b> |
| Diabetes Duration        | 1.05  | [1.04, 1.06]  | <b>&lt;0.0001</b> |
| HbA1c                    |       |               |                   |
| Baseline                 | 1.00  | [0.987, 1.02] | 0.813             |
| Mean                     | 1.13  | [1.11, 1.15]  | <b>&lt;0.0001</b> |
| Standard Deviation       | 1.07  | [1.04, 1.10]  | <b>&lt;0.0001</b> |
| Coefficient of Variation | 1.00  | [1.00, 1.01]  | 0.089             |
| Total Cholesterol        |       |               |                   |
| Baseline                 | 0.999 | [0.973, 1.03] | 0.943             |
| Mean                     | 1.08  | [1.05, 1.12]  | <b>&lt;0.0001</b> |
| Standard Deviation       | 1.18  | [1.11, 1.24]  | <b>&lt;0.0001</b> |
| Coefficient of Variation | 1.01  | [1.01, 1.01]  | <b>&lt;0.0001</b> |



|                             |       |                |                 |
|-----------------------------|-------|----------------|-----------------|
| HDL Cholesterol             |       |                |                 |
| Baseline                    | 1.00  | [0.929, 1.08]  | 0.979           |
| Mean                        | 0.510 | [0.464, 0.560] | < <b>0.0001</b> |
| Standard Deviation          | 0.372 | [0.268, 0.516] | < <b>0.0001</b> |
| Coefficient of Variation    | 1.00  | [0.996, 1.00]  | 0.906           |
| LDL Cholesterol             |       |                |                 |
| Baseline                    | 1.00  | [0.969, 1.04]  | 0.942           |
| Mean                        | 1.04  | [0.998, 1.09]  | 0.062           |
| Standard Deviation          | 1.27  | [1.18, 1.38]   | < <b>0.0001</b> |
| Coefficient of Variation    | 1.01  | [1.01, 1.01]   | < <b>0.0001</b> |
| Triglyceride                |       |                |                 |
| Baseline                    | 0.989 | [0.970, 1.01]  | 0.231           |
| Mean                        | 1.10  | [1.08, 1.11]   | < <b>0.0001</b> |
| Standard Deviation          | 1.06  | [1.04, 1.08]   | < <b>0.0001</b> |
| Coefficient of Variation    | 1.00  | [1.00, 1.00]   | <b>0.045</b>    |
| Baseline NLR                | 1.00  | [0.994, 1.01]  | 0.821           |
| Baseline Hemoglobin Count   | 0.908 | [0.896, 0.921] | < <b>0.0001</b> |
| Baseline Anemia             | 1.46  | [1.38, 1.55]   | < <b>0.0001</b> |
| Hypoglycemia Frequency      | 1.00  | [0.982, 1.02]  | 0.865           |
| Anti-Diabetic Agent         |       |                |                 |
| Sulphonylurea               | 1.29  | [1.22, 1.36]   | < <b>0.0001</b> |
| Biguanide                   | 0.970 | [0.920, 1.02]  | 0.275           |
| DPP4 Inhibitor              | 0.761 | [0.485, 1.19]  | 0.234           |
| Thiazolidinedione           | 1.00  | [0.867, 1.16]  | 0.986           |
| Alpha-Glucosidase Inhibitor | 1.14  | [0.986, 1.33]  | 0.075           |

*Dementia*

|                          |       |                |                 |
|--------------------------|-------|----------------|-----------------|
| Age                      | 1.08  | [1.07, 1.08]   | < <b>0.0001</b> |
| Male                     | 0.717 | [0.630, 0.815] | < <b>0.0001</b> |
| Diabetes Duration        | 0.981 | [0.956, 1.01]  | 0.140           |
| HbA1c                    |       |                |                 |
| Baseline                 | 1.00  | [0.968, 1.04]  | 0.891           |
| Mean                     | 1.00  | [0.953, 1.05]  | 0.963           |
| Standard Deviation       | 1.11  | [1.03, 1.19]   | <b>0.005</b>    |
| Coefficient of Variation | 1.01  | [1.00, 1.02]   | <b>0.003</b>    |
| Total Cholesterol        |       |                |                 |
| Baseline                 | 0.984 | [0.922, 1.05]  | 0.617           |
| Mean                     | 0.945 | [0.871, 1.03]  | 0.181           |
| Standard Deviation       | 1.01  | [0.864, 1.17]  | 0.935           |
| Coefficient of Variation | 1.00  | [0.995, 1.01]  | 0.411           |
| HDL Cholesterol          |       |                |                 |
| Baseline                 | 1.02  | [0.852, 1.23]  | 0.818           |
| Mean                     | 0.956 | [0.779, 1.17]  | 0.664           |
| Standard Deviation       | 1.35  | [0.660, 2.74]  | 0.414           |
| Coefficient of Variation | 1.01  | [0.995, 1.02]  | 0.342           |
| LDL Cholesterol          |       |                |                 |
| Baseline                 | 1.05  | [0.971, 1.14]  | 0.220           |
| Mean                     | 0.925 | [0.835, 1.03]  | 0.140           |
| Standard Deviation       | 1.17  | [0.960, 1.42]  | 0.119           |

|                             |       |                |                   |
|-----------------------------|-------|----------------|-------------------|
| Coefficient of Variation    | 1.01  | [1.00, 1.01]   | <b>0.013</b>      |
| Triglyceride                |       |                |                   |
| Baseline                    | 0.990 | [0.946, 1.04]  | 0.643             |
| Mean                        | 1.00  | [0.956, 1.05]  | 0.877             |
| Standard Deviation          | 0.981 | [0.917, 1.05]  | 0.569             |
| Coefficient of Variation    | 0.999 | [0.995, 1.00]  | 0.532             |
| Baseline NLR                | 1.01  | [0.993, 1.02]  | 0.302             |
| Baseline Hemoglobin Count   | 0.927 | [0.897, 0.957] | <b>&lt;0.0001</b> |
| Baseline Anemia             | 1.43  | [1.25, 1.64]   | <b>&lt;0.0001</b> |
| Hypoglycemia Frequency      | 1.01  | [0.964, 1.05]  | 0.723             |
| Anti-Diabetic Agent         |       |                |                   |
| Sulphonylurea               | 1.22  | [1.08, 1.39]   | <b>0.002</b>      |
| Biguanide                   | 0.962 | [0.846, 1.09]  | 0.548             |
| DPP4 Inhibitor              | 0.459 | [0.115, 1.84]  | 0.271             |
| Thiazolidinedione           | 0.857 | [0.592, 1.24]  | 0.414             |
| Alpha-Glucosidase Inhibitor | 0.729 | [0.473, 1.12]  | 0.152             |

*Osteoporosis*

|                           |       |                |                   |
|---------------------------|-------|----------------|-------------------|
| Age                       | 1.06  | [1.04, 1.07]   | <b>&lt;0.0001</b> |
| Male                      | 0.249 | [0.186, 0.335] | <b>&lt;0.0001</b> |
| Diabetes Duration         | 1.01  | [0.961, 1.06]  | 0.776             |
| HbA1c                     |       |                |                   |
| Baseline                  | 0.957 | [0.893, 1.03]  | 0.205             |
| Mean                      | 1.00  | [0.916, 1.10]  | 0.943             |
| Standard Deviation        | 0.879 | [0.747, 1.04]  | 0.123             |
| Coefficient of Variation  | 0.985 | [0.969, 1.00]  | 0.059             |
| Total Cholesterol         |       |                |                   |
| Baseline                  | 0.997 | [0.885, 1.12]  | 0.954             |
| Mean                      | 1.06  | [0.918, 1.23]  | 0.411             |
| Standard Deviation        | 0.966 | [0.720, 1.30]  | 0.819             |
| Coefficient of Variation  | 0.997 | [0.981, 1.01]  | 0.757             |
| HDL Cholesterol           |       |                |                   |
| Baseline                  | 1.01  | [0.723, 1.41]  | 0.958             |
| Mean                      | 1.78  | [1.29, 2.44]   | <b>&lt;0.001</b>  |
| Standard Deviation        | 1.49  | [0.412, 5.42]  | 0.542             |
| Coefficient of Variation  | 0.987 | [0.968, 1.01]  | 0.222             |
| LDL Cholesterol           |       |                |                   |
| Baseline                  | 1.04  | [0.902, 1.21]  | 0.566             |
| Mean                      | 1.03  | [0.854, 1.24]  | 0.773             |
| Standard Deviation        | 0.940 | [0.639, 1.38]  | 0.752             |
| Coefficient of Variation  | 0.996 | [0.985, 1.01]  | 0.489             |
| Triglyceride              |       |                |                   |
| Baseline                  | 1.04  | [0.991, 1.09]  | 0.117             |
| Mean                      | 0.918 | [0.818, 1.03]  | 0.145             |
| Standard Deviation        | 0.855 | [0.708, 1.03]  | 0.105             |
| Coefficient of Variation  | 0.990 | [0.981, 0.998] | <b>0.020</b>      |
| Baseline NLR              | 0.986 | [0.951, 1.02]  | 0.454             |
| Baseline Hemoglobin Count | 0.853 | [0.803, 0.906] | <b>&lt;0.0001</b> |

|                             |       |               |                   |
|-----------------------------|-------|---------------|-------------------|
| Baseline Anemia             | 1.71  | [1.32, 2.21]  | <b>&lt;0.0001</b> |
| Hypoglycemia Frequency      | 1.04  | [0.969, 1.12] | 0.263             |
| Anti-Diabetic Agent         |       |               |                   |
| Sulphonylurea               | 0.924 | [0.726, 1.18] | 0.522             |
| Biguanide                   | 1.21  | [0.948, 1.54] | 0.127             |
| DPP4 Inhibitor              | 0.808 | [0.113, 5.76] | 0.831             |
| Thiazolidinedione           | 0.608 | [0.271, 1.37] | 0.228             |
| Alpha-Glucosidase Inhibitor | 1.10  | [0.567, 2.14] | 0.775             |

*Peripheral Vascular Disease*

|                             |       |                |                   |
|-----------------------------|-------|----------------|-------------------|
| Age                         | 1.02  | [1.01, 1.02]   | <b>&lt;0.0001</b> |
| Male                        | 1.36  | [1.17, 1.58]   | <b>&lt;0.0001</b> |
| Diabetes Duration           | 0.968 | [0.939, 0.998] | <b>0.035</b>      |
| HbA1c                       |       |                |                   |
| Baseline                    | 1.03  | [0.987, 1.07]  | 0.195             |
| Mean                        | 1.20  | [1.14, 1.26]   | <b>&lt;0.0001</b> |
| Standard Deviation          | 1.19  | [1.11, 1.28]   | <b>&lt;0.0001</b> |
| Coefficient of Variation    | 1.01  | [1.01, 1.02]   | <b>0.001</b>      |
| Total Cholesterol           |       |                |                   |
| Baseline                    | 0.938 | [0.870, 1.01]  | 0.095             |
| Mean                        | 1.14  | [1.05, 1.25]   | <b>0.003</b>      |
| Standard Deviation          | 1.34  | [1.21, 1.50]   | <b>&lt;0.0001</b> |
| Coefficient of Variation    | 1.02  | [1.01, 1.03]   | <b>&lt;0.0001</b> |
| HDL Cholesterol             |       |                |                   |
| Baseline                    | 1.10  | [0.905, 1.35]  | 0.330             |
| Mean                        | 0.452 | [0.346, 0.590] | <b>&lt;0.0001</b> |
| Standard Deviation          | 1.82  | [0.840, 3.93]  | 0.130             |
| Coefficient of Variation    | 1.03  | [1.02, 1.03]   | <b>&lt;0.0001</b> |
| LDL Cholesterol             |       |                |                   |
| Baseline                    | 0.937 | [0.853, 1.03]  | 0.177             |
| Mean                        | 1.11  | [0.994, 1.24]  | 0.065             |
| Standard Deviation          | 1.54  | [1.26, 1.88]   | <b>&lt;0.0001</b> |
| Coefficient of Variation    | 1.01  | [1.01, 1.02]   | <b>&lt;0.001</b>  |
| Triglyceride                |       |                |                   |
| Baseline                    | 1.00  | [0.959, 1.05]  | 0.898             |
| Mean                        | 1.09  | [1.06, 1.13]   | <b>&lt;0.0001</b> |
| Standard Deviation          | 1.09  | [1.05, 1.13]   | <b>&lt;0.0001</b> |
| Coefficient of Variation    | 1.01  | [1.00, 1.01]   | <b>&lt;0.0001</b> |
| Baseline NLR                | 1.02  | [1.00, 1.03]   | <b>0.016</b>      |
| Baseline Hemoglobin Count   | 0.868 | [0.836, 0.901] | <b>&lt;0.0001</b> |
| Baseline Anemia             | 1.71  | [1.46, 2.01]   | <b>&lt;0.0001</b> |
| Hypoglycemia Frequency      | 1.07  | [1.03, 1.12]   | <b>0.001</b>      |
| Anti-Diabetic Agent         |       |                |                   |
| Sulphonylurea               | 0.897 | [0.772, 1.04]  | 0.159             |
| Biguanide                   | 0.768 | [0.663, 0.889] | 0.889             |
| DPP4 Inhibitor              | 0.943 | [0.304, 2.93]  | 0.919             |
| Thiazolidinedione           | 0.952 | [0.634, 1.43]  | 0.812             |
| Alpha-Glucosidase Inhibitor | 1.81  | [1.30, 2.52]   | <b>&lt;0.001</b>  |

| <i>Intracranial Hemorrhage</i>                                                  |       |                |                   |
|---------------------------------------------------------------------------------|-------|----------------|-------------------|
| Age                                                                             | 1.03  | [1.02, 1.03]   | <b>&lt;0.0001</b> |
| Male                                                                            | 1.20  | [1.06, 1.35]   | <b>0.004</b>      |
| Diabetes Duration                                                               | 0.966 | [0.942, 0.990] | <b>0.006</b>      |
| HbA1c                                                                           |       |                |                   |
| Baseline                                                                        | 1.02  | [0.988, 1.05]  | 0.218             |
| Mean                                                                            | 0.991 | [0.945, 1.04]  | 0.703             |
| Standard Deviation                                                              | 1.04  | [0.970, 1.12]  | 0.265             |
| Coefficient of Variation                                                        | 1.01  | [0.998, 1.01]  | 0.168             |
| Total Cholesterol                                                               |       |                |                   |
| Baseline                                                                        | 0.950 | [0.893, 1.01]  | 0.104             |
| Mean                                                                            | 0.945 | [0.875, 1.02]  | 0.155             |
| Standard Deviation                                                              | 1.13  | [1.00, 1.29]   | <b>0.050</b>      |
| Coefficient of Variation                                                        | 1.01  | [1.00, 1.02]   | <b>0.026</b>      |
| HDL Cholesterol                                                                 |       |                |                   |
| Baseline                                                                        | 0.980 | [0.826, 1.16]  | 0.815             |
| Mean                                                                            | 0.757 | [0.619, 0.926] | <b>0.007</b>      |
| Standard Deviation                                                              | 1.17  | [0.598, 2.30]  | 0.644             |
| Coefficient of Variation                                                        | 1.01  | [1.00, 1.02]   | <b>0.020</b>      |
| LDL Cholesterol                                                                 |       |                |                   |
| Baseline                                                                        | 0.975 | [0.902, 1.05]  | 0.513             |
| Mean                                                                            | 0.875 | [0.794, 0.964] | <b>0.007</b>      |
| Standard Deviation                                                              | 1.15  | [0.954, 1.38]  | 0.145             |
| Coefficient of Variation                                                        | 1.01  | [1.00, 1.01]   | <b>0.008</b>      |
| Triglyceride                                                                    |       |                |                   |
| Baseline                                                                        | 0.994 | [0.955, 1.04]  | 0.776             |
| Mean                                                                            | 1.07  | [1.03, 1.10]   | <b>&lt;0.001</b>  |
| Standard Deviation                                                              | 1.05  | [1.00, 1.10]   | <b>0.033</b>      |
| Coefficient of Variation                                                        | 1.00  | [0.998, 1.01]  | 0.462             |
| Baseline NLR                                                                    | 1.00  | [0.989, 1.02]  | 0.623             |
| Baseline Hemoglobin Count                                                       | 0.923 | [0.894, 0.952] | <b>&lt;0.0001</b> |
| Baseline Anemia                                                                 | 1.19  | [1.05, 1.35]   | <b>0.008</b>      |
| Hypoglycemia Frequency                                                          | 1.04  | [0.997, 1.08]  | 0.075             |
| Anti-Diabetic Agent                                                             |       |                |                   |
| Sulphonylurea                                                                   | 1.17  | [1.04, 1.32]   | <b>0.012</b>      |
| Biguanide                                                                       | 0.875 | [0.775, 0.988] | <b>0.031</b>      |
| DPP4 Inhibitor                                                                  | 0.850 | [0.318, 2.27]  | 0.746             |
| Thiazolidinedione                                                               | 1.05  | [0.763, 1.45]  | 0.764             |
| Alpha-Glucosidase Inhibitor                                                     | 0.887 | [0.610, 1.29]  | 0.533             |
| <i>Ischemic Stroke and Transient Ischemic Attack/ Transient Ischemic Attack</i> |       |                |                   |
| Age                                                                             | 1.03  | [1.03, 1.04]   | <b>&lt;0.0001</b> |
| Male                                                                            | 0.998 | [0.897, 1.11]  | 0.964             |
| Diabetes Duration                                                               | 0.989 | [0.968, 1.01]  | 0.327             |
| HbA1c                                                                           |       |                |                   |
| Baseline                                                                        | 0.984 | [0.954, 1.01]  | 0.291             |
| Mean                                                                            | 1.05  | [1.01, 1.09]   | <b>0.024</b>      |
| Standard Deviation                                                              | 0.994 | [0.929, 1.06]  | 0.854             |
| Coefficient of Variation                                                        | 0.997 | [0.990, 1.00]  | 0.350             |

|                             |       |                |              |
|-----------------------------|-------|----------------|--------------|
| Total Cholesterol           |       |                |              |
| Baseline                    | 0.987 | [0.935, 1.04]  | 0.637        |
| Mean                        | 1.03  | [0.967, 1.11]  | 0.329        |
| Standard Deviation          | 1.10  | [0.977, 1.24]  | 0.114        |
| Coefficient of Variation    | 1.01  | [0.999, 1.01]  | 0.113        |
| HDL Cholesterol             |       |                |              |
| Baseline                    | 1.01  | [0.872, 1.18]  | 0.868        |
| Mean                        | 0.800 | [0.671, 0.954] | <b>0.013</b> |
| Standard Deviation          | 1.20  | [0.660, 2.18]  | 0.551        |
| Coefficient of Variation    | 1.01  | [1.00, 1.02]   | 0.061        |
| LDL Cholesterol             |       |                |              |
| Baseline                    | 0.967 | [0.903, 1.04]  | 0.335        |
| Mean                        | 1.00  | [0.922, 1.09]  | 0.942        |
| Standard Deviation          | 1.14  | [0.962, 1.34]  | 0.133        |
| Coefficient of Variation    | 1.00  | [0.999, 1.01]  | 0.119        |
| Triglyceride                |       |                |              |
| Baseline                    | 0.981 | [0.943, 1.02]  | 0.342        |
| Mean                        | 1.05  | [1.02, 1.09]   | <b>0.003</b> |
| Standard Deviation          | 1.03  | [0.985, 1.08]  | 0.193        |
| Coefficient of Variation    | 1.00  | [0.997, 1.00]  | 0.995        |
| Baseline NLR                | 1.01  | [0.992, 1.02]  | 0.404        |
| Baseline Hemoglobin Count   | 0.986 | [0.958, 1.02]  | 0.337        |
| Baseline Anemia             | 1.07  | [0.956, 1.20]  | 0.232        |
| Hypoglycemia Frequency      | 1.00  | [0.963, 1.04]  | 0.963        |
| Anti-Diabetic Agent         |       |                |              |
| Sulphonylurea               | 1.19  | [1.07, 1.33]   | <b>0.001</b> |
| Biguanide                   | 1.18  | [1.06, 1.32]   | <b>0.003</b> |
| DPP4 Inhibitor              | 0.491 | [0.158, 1.52]  | 0.218        |
| Thiazolidinedione           | 0.765 | [0.551, 1.06]  | 0.107        |
| Alpha-Glucosidase Inhibitor | 0.891 | [0.640, 1.24]  | 0.496        |

*Ischemic Heart Disease*

|                          |       |                |                   |
|--------------------------|-------|----------------|-------------------|
| Age                      | 1.02  | [1.02, 1.02]   | <b>&lt;0.0001</b> |
| Male                     | 1.03  | [0.975, 1.10]  | 0.266             |
| Diabetes Duration        | 1.02  | [1.01, 1.04]   | <b>&lt;0.0001</b> |
| HbA1c                    |       |                |                   |
| Baseline                 | 0.996 | [0.980, 1.01]  | 0.647             |
| Mean                     | 1.05  | [1.03, 1.08]   | <b>&lt;0.0001</b> |
| Standard Deviation       | 0.987 | [0.951, 1.02]  | 0.470             |
| Coefficient of Variation | 0.996 | [0.993, 1.00]  | <b>0.046</b>      |
| Total Cholesterol        |       |                |                   |
| Baseline                 | 1.01  | [0.978, 1.04]  | 0.634             |
| Mean                     | 1.25  | [1.21, 1.30]   | <b>&lt;0.0001</b> |
| Standard Deviation       | 1.22  | [1.16, 1.29]   | <b>&lt;0.0001</b> |
| Coefficient of Variation | 1.01  | [1.01, 1.01]   | <b>&lt;0.0001</b> |
| HDL Cholesterol          |       |                |                   |
| Baseline                 | 1.12  | [1.03, 1.21]   | <b>0.006</b>      |
| Mean                     | 0.642 | [0.581, 0.710] | <b>&lt;0.0001</b> |

|                             |       |                |                   |
|-----------------------------|-------|----------------|-------------------|
| Standard Deviation          | 0.596 | [0.421, 0.844] | <b>0.004</b>      |
| Coefficient of Variation    | 1.00  | [0.998, 1.01]  | 0.366             |
| LDL Cholesterol             |       |                |                   |
| Baseline                    | 1.01  | [0.972, 1.05]  | 0.675             |
| Mean                        | 1.27  | [1.22, 1.33]   | <b>&lt;0.0001</b> |
| Standard Deviation          | 1.43  | [1.32, 1.56]   | <b>&lt;0.0001</b> |
| Coefficient of Variation    | 1.01  | [1.00, 1.01]   | <b>&lt;0.0001</b> |
| Triglyceride                |       |                |                   |
| Baseline                    | 0.981 | [0.960, 1.00]  | 0.084             |
| Mean                        | 1.09  | [1.07, 1.10]   | <b>&lt;0.0001</b> |
| Standard Deviation          | 1.05  | [1.02, 1.07]   | <b>&lt;0.0001</b> |
| Coefficient of Variation    | 1.00  | [0.999, 1.00]  | 0.313             |
| Baseline NLR                | 1.00  | [0.996, 1.01]  | 0.379             |
| Baseline Hemoglobin Count   | 0.925 | [0.911, 0.939] | <b>&lt;0.0001</b> |
| Baseline Anemia             | 1.29  | [1.21, 1.38]   | <b>&lt;0.0001</b> |
| Hypoglycemia Frequency      | 1.00  | [0.979, 1.02]  | 0.983             |
| Anti-Diabetic Agent         |       |                |                   |
| Sulphonylurea               | 1.16  | [1.09, 1.23]   | <b>&lt;0.0001</b> |
| Biguanide                   | 1.10  | [1.03, 1.16]   | <b>0.003</b>      |
| DPP4 Inhibitor              | 1.13  | [0.752, 1.71]  | 0.553             |
| Thiazolidinedione           | 1.13  | [0.974, 1.31]  | 0.107             |
| Alpha-Glucosidase Inhibitor | 1.20  | [1.03, 1.41]   | <b>0.023</b>      |

*Acute Myocardial Infarction*

|                          |       |                |                   |
|--------------------------|-------|----------------|-------------------|
| Age                      | 1.03  | [1.03, 1.03]   | <b>&lt;0.0001</b> |
| Male                     | 0.80  | [0.914, 1.05]  | 0.562             |
| Diabetes Duration        | 0.989 | [0.975, 1.00]  | 0.103             |
| HbA1c                    |       |                |                   |
| Baseline                 | 1.01  | [0.986, 1.03]  | 0.603             |
| Mean                     | 1.07  | [1.04, 1.10]   | <b>&lt;0.0001</b> |
| Standard Deviation       | 1.01  | [0.966, 1.05]  | 0.726             |
| Coefficient of Variation | 0.998 | [0.994, 1.00]  | 0.338             |
| Total Cholesterol        |       |                |                   |
| Baseline                 | 0.990 | [0.956, 1.03]  | 0.562             |
| Mean                     | 1.18  | [1.13, 1.23]   | <b>&lt;0.0001</b> |
| Standard Deviation       | 1.22  | [1.14, 1.30]   | <b>&lt;0.0001</b> |
| Coefficient of Variation | 1.01  | [1.01, 1.02]   | <b>&lt;0.0001</b> |
| HDL Cholesterol          |       |                |                   |
| Baseline                 | 0.992 | [0.900, 1.09]  | 0.867             |
| Mean                     | 0.522 | [0.462, 0.591] | <b>&lt;0.0001</b> |
| Standard Deviation       | 0.680 | [0.453, 1.02]  | 0.064             |
| Coefficient of Variation | 1.01  | [1.00, 1.01]   | <b>0.005</b>      |
| LDL Cholesterol          |       |                |                   |
| Baseline                 | 0.982 | [0.940, 1.03]  | 0.430             |
| Mean                     | 1.18  | [1.12, 1.24]   | <b>&lt;0.0001</b> |
| Standard Deviation       | 1.41  | [1.28, 1.56]   | <b>&lt;0.0001</b> |
| Coefficient of Variation | 1.01  | [1.00, 1.01]   | <b>&lt;0.0001</b> |
| Triglyceride             |       |                |                   |

|                             |       |                |                 |
|-----------------------------|-------|----------------|-----------------|
| Baseline                    | 0.977 | [0.952, 1.00]  | 0.076           |
| Mean                        | 1.09  | [1.08, 1.11]   | < <b>0.0001</b> |
| Standard Deviation          | 1.06  | [1.03, 1.08]   | < <b>0.0001</b> |
| Coefficient of Variation    | 1.00  | [1.00, 1.00]   | <b>0.042</b>    |
| Baseline NLR                | 1.00  | [0.993, 1.01]  | 0.601           |
| Baseline Hemoglobin Count   | 0.895 | [0.879, 0.911] | < <b>0.0001</b> |
| Baseline Anemia             | 1.48  | [1.38, 1.60]   | < <b>0.0001</b> |
| Hypoglycemia Frequency      | 1.01  | [0.982, 1.03]  | 0.619           |
| Anti-Diabetic Agent         |       |                |                 |
| Sulphonylurea               | 1.22  | [1.14, 1.31]   | < <b>0.0001</b> |
| Biguanide                   | 0.961 | [0.896, 1.03]  | 0.271           |
| DPP4 Inhibitor              | 0.836 | [0.474, 1.47]  | 0.535           |
| Thiazolidinedione           | 0.868 | [0.710, 1.06]  | 0.164           |
| Alpha-Glucosidase Inhibitor | 1.23  | [1.02, 1.48]   | <b>0.032</b>    |

*Atrial Fibrillation*

|                           |       |                |                 |
|---------------------------|-------|----------------|-----------------|
| Age                       | 1.04  | [1.04, 1.05]   | < <b>0.0001</b> |
| Male                      | 0.884 | [0.807, 0.968] | <b>0.008</b>    |
| Diabetes Duration         | 0.989 | [0.975, 1.00]  | 0.103           |
| HbA1c                     |       |                |                 |
| Baseline                  | 1.00  | [0.975, 1.03]  | 0.975           |
| Mean                      | 0.961 | [0.926, 0.996] | <b>0.029</b>    |
| Standard Deviation        | 1.05  | [0.993, 1.11]  | 0.090           |
| Coefficient of Variation  | 1.01  | [1.00, 1.01]   | <b>0.024</b>    |
| Total Cholesterol         |       |                |                 |
| Baseline                  | 1.03  | [0.990, 1.08]  | 0.134           |
| Mean                      | 0.889 | [0.838, 0.943] | < <b>0.0001</b> |
| Standard Deviation        | 1.12  | [1.02, 1.23]   | <b>0.020</b>    |
| Coefficient of Variation  | 1.01  | [1.01, 1.02]   | < <b>0.001</b>  |
| HDL Cholesterol           |       |                |                 |
| Baseline                  | 1.02  | [0.894, 1.15]  | 0.823           |
| Mean                      | 0.667 | [0.572, 0.779] | < <b>0.0001</b> |
| Standard Deviation        | 0.988 | [0.590, 1.65]  | 0.962           |
| Coefficient of Variation  | 1.01  | [1.00, 1.02]   | <b>0.005</b>    |
| LDL Cholesterol           |       |                |                 |
| Baseline                  | 1.03  | [0.969, 1.09]  | 0.389           |
| Mean                      | 0.832 | [0.773, 0.895] | < <b>0.0001</b> |
| Standard Deviation        | 1.20  | [1.04, 1.37]   | <b>0.011</b>    |
| Coefficient of Variation  | 1.01  | [1.01, 1.01]   | < <b>0.0001</b> |
| Triglyceride              |       |                |                 |
| Baseline                  | 0.982 | [0.950, 1.01]  | 0.266           |
| Mean                      | 1.04  | [1.01, 1.07]   | <b>0.019</b>    |
| Standard Deviation        | 0.998 | [0.955, 1.04]  | 0.914           |
| Coefficient of Variation  | 0.998 | [0.995, 1.00]  | 0.147           |
| Baseline NLR              | 1.00  | [0.992, 1.02]  | 0.574           |
| Baseline Hemoglobin Count | 0.907 | [0.886, 0.929] | < <b>0.0001</b> |
| Baseline Anemia           | 1.41  | [1.28, 1.56]   | < <b>0.0001</b> |
| Hypoglycemia Frequency    | 1.03  | [1.00, 1.06]   | <b>0.030</b>    |

|                             |       |               |              |
|-----------------------------|-------|---------------|--------------|
| Anti-Diabetic Agent         |       |               |              |
| Sulphonylurea               | 1.17  | [1.07, 1.28]  | <b>0.001</b> |
| Biguanide                   | 0.933 | [0.851, 1.02] | 0.136        |
| DPP4 Inhibitor              | 0.716 | [0.321, 1.60] | 0.413        |
| Thiazolidinedione           | 0.965 | [0.751, 1.24] | 0.781        |
| Alpha-Glucosidase Inhibitor | 1.00  | [0.765, 1.31] | 0.997        |

*Heart Failure*

|                             |       |                |                   |
|-----------------------------|-------|----------------|-------------------|
| Age                         | 1.03  | [1.03, 1.04]   | <b>&lt;0.0001</b> |
| Male                        | 1.27  | [1.17, 1.39]   | <b>&lt;0.0001</b> |
| Diabetes Duration           | 0.937 | [0.919, 0.955] | <b>&lt;0.0001</b> |
| HbA1c                       |       |                |                   |
| Baseline                    | 1.02  | [0.993, 1.04]  | 0.170             |
| Mean                        | 1.05  | [1.02, 1.09]   | <b>0.004</b>      |
| Standard Deviation          | 1.10  | [1.04, 1.16]   | <b>&lt;0.001</b>  |
| Coefficient of Variation    | 1.01  | [1.00, 1.01]   | <b>0.001</b>      |
| Total Cholesterol           |       |                |                   |
| Baseline                    | 0.999 | [0.954, 1.05]  | 0.961             |
| Mean                        | 1.06  | [0.997, 1.12]  | 0.065             |
| Standard Deviation          | 1.28  | [1.19, 1.38]   | <b>&lt;0.0001</b> |
| Coefficient of Variation    | 1.02  | [1.01, 1.03]   | <b>&lt;0.0001</b> |
| HDL Cholesterol             |       |                |                   |
| Baseline                    | 0.976 | [0.857, 1.11]  | 0.709             |
| Mean                        | 0.417 | [0.352, 0.494] | <b>&lt;0.0001</b> |
| Standard Deviation          | 1.25  | [0.754, 2.07]  | 0.387             |
| Coefficient of Variation    | 1.02  | [1.02, 1.03]   | <b>&lt;0.0001</b> |
| LDL Cholesterol             |       |                |                   |
| Baseline                    | 1.02  | [0.962, 1.08]  | 0.517             |
| Mean                        | 1.06  | [0.988, 1.14]  | 0.103             |
| Standard Deviation          | 1.51  | [1.33, 1.71]   | <b>&lt;0.0001</b> |
| Coefficient of Variation    | 1.01  | [1.01, 1.02]   | <b>&lt;0.0001</b> |
| Triglyceride                |       |                |                   |
| Baseline                    | 1.00  | [0.973, 1.03]  | 0.930             |
| Mean                        | 1.09  | [1.07, 1.12]   | <b>&lt;0.0001</b> |
| Standard Deviation          | 1.06  | [1.03, 1.09]   | <b>&lt;0.001</b>  |
| Coefficient of Variation    | 1.00  | [1.00, 1.01]   | <b>0.006</b>      |
| Baseline NLR                | 1.02  | [1.01, 1.03]   | <b>&lt;0.0001</b> |
| Baseline Hemoglobin Count   | 0.835 | [0.815, 0.854] | <b>&lt;0.0001</b> |
| Baseline Anemia             | 1.85  | [1.67, 2.04]   | <b>&lt;0.0001</b> |
| Hypoglycemia Frequency      | 1.08  | [1.06, 1.11]   | <b>&lt;0.0001</b> |
| Anti-Diabetic Agent         |       |                |                   |
| Sulphonylurea               | 1.30  | [1.19, 1.43]   | <b>&lt;0.0001</b> |
| Biguanide                   | 0.618 | [0.563, 0.678] | <b>&lt;0.0001</b> |
| DPP4 Inhibitor              | 0.608 | [0.253, 1.46]  | 0.266             |
| Thiazolidinedione           | 0.722 | [0.540, 0.964] | <b>0.027</b>      |
| Alpha-Glucosidase Inhibitor | 1.17  | [0.905, 1.50]  | 0.235             |

*All-Cause Mortality*

|     |      |              |                   |
|-----|------|--------------|-------------------|
| Age | 1.06 | [1.06, 1.06] | <b>&lt;0.0001</b> |
|-----|------|--------------|-------------------|



|                             |       |                |                 |
|-----------------------------|-------|----------------|-----------------|
| Male                        | 1.14  | [1.10, 1.18]   | < <b>0.0001</b> |
| Diabetes Duration           | 0.930 | [0.923, 0.936] | < <b>0.0001</b> |
| HbA1c                       |       |                |                 |
| Baseline                    | 0.997 | [0.988, 1.01]  | 0.549           |
| Mean                        | 0.964 | [0.951, 0.977] | < <b>0.0001</b> |
| Standard Deviation          | 1.11  | [1.09, 1.14]   | < <b>0.0001</b> |
| Coefficient of Variation    | 1.01  | [1.01, 1.01]   | < <b>0.0001</b> |
| Total Cholesterol           |       |                |                 |
| Baseline                    | 0.992 | [0.976, 1.01]  | 0.340           |
| Mean                        | 0.965 | [0.943, 0.988] | <b>0.003</b>    |
| Standard Deviation          | 1.29  | [1.25, 1.33]   | < <b>0.0001</b> |
| Coefficient of Variation    | 1.02  | [1.02, 1.03]   | < <b>0.0001</b> |
| HDL Cholesterol             |       |                |                 |
| Baseline                    | 0.964 | [0.921, 1.01]  | 0.114           |
| Mean                        | 0.571 | [0.537, 0.607] | < <b>0.0001</b> |
| Standard Deviation          | 3.11  | [2.60, 3.72]   | < <b>0.0001</b> |
| Coefficient of Variation    | 0.970 | [0.927, 1.02]  | 0.194           |
| LDL Cholesterol             |       |                |                 |
| Baseline                    | 1.02  | [0.995, 1.04]  | 0.131           |
| Mean                        | 0.919 | [0.893, 0.946] | < <b>0.0001</b> |
| Standard Deviation          | 1.56  | [1.48, 1.64]   | < <b>0.0001</b> |
| Coefficient of Variation    | 1.02  | [1.01, 1.02]   | < <b>0.0001</b> |
| Triglyceride                |       |                |                 |
| Baseline                    | 0.989 | [0.978, 1.00]  | 0.0557          |
| Mean                        | 1.06  | [1.05, 1.07]   | < <b>0.0001</b> |
| Standard Deviation          | 1.03  | [1.02, 1.04]   | < <b>0.0001</b> |
| Coefficient of Variation    | 1.00  | [1.00, 1.00]   | <b>0.002</b>    |
| Baseline NLR                | 1.03  | [1.03, 1.04]   | < <b>0.0001</b> |
| Baseline Hemoglobin Count   | 0.794 | [0.786, 0.801] | < <b>0.0001</b> |
| Baseline Anemia             | 2.11  | [2.04, 2.20]   | < <b>0.0001</b> |
| Hypoglycemia Frequency      | 1.08  | [1.06, 1.09]   | < <b>0.0001</b> |
| Anti-Diabetic Agent         |       |                |                 |
| Sulphonylurea               | 1.13  | [1.09, 1.17]   | < <b>0.0001</b> |
| Biguanide                   | 0.541 | [0.522, 0.560] | < <b>0.0001</b> |
| DPP4 Inhibitor              | 0.450 | [0.324, 0.655] | < <b>0.0001</b> |
| Thiazolidinedione           | 0.703 | [0.632, 0.782] | < <b>0.0001</b> |
| Alpha-Glucosidase Inhibitor | 1.05  | [0.953, 1.17]  | 0.305           |
